# Supplementary material for: Functional variants identify sex-specific genes and pathways in Alzheimer’s Disease
Source: PubMed Central journal article supplement (PMC10183026; doi:10.1038/s41467-023-38374-z), 2023-05-13
Supplement: 41467_2023_38374_MOESM2_ESM.pdf [file 41467_2023_38374_MOESM2_ESM.pdf]

### **Description of Additional Supplementary Files**

File Name: Supplementary Data 1

Description: top EAML candidate genes of Full, Male, and Female cohort

File Name: Supplementary Data 2

Description: List of Tau and  $\beta$ 42 suppressors and enhancers in the Drosophila screen. Includes, homolog, line tested and source and p values for non linear random mixed effects model ANOVA comparisons using splines as described in materials and methods.

File Name: Supplementary Data 3

Description: Recurrent genes over downsampling analyses
